# Supplementary material for: Synthesis of a novel hybrid metal–organic salt and its solid-state transformation
Source: Royal Society of Chemistry journal article supplement (doi:10.1039/c3nj01400b), 2014-01-01
Supplement: c3nj01400b1.pdf [file c3nj01400b1.pdf]

## Supporting Information for “Synthesis of a Novel Hybrid Metal Organic Salt and its Solid-State Transformation.”

Javier Martí-Rujas,\* Massimo Cametti.

### Contents

#### 1. Experimental

**Fig. S1.** ORTEP view of the crystal structure of **1** after manually removing the water molecule in order to show the void space left (i.e., pocket). Using a 1.2 Å probe radius, grid spacing of 0.5 Å and considering the contact surface area the void volume corresponds to 1.9 % of the total unit cell volume.

**Table. S1** List of all the symmetry operators observed in **1**.

#### 2. Single crystal X-ray structure of **2**.

**Fig. S2.** (a) Crystal structure of salt **2** viewed along the *b*-axis; (b) detailed view of the dication showing the trifurcated weak intramolecular N–H···O hydrogen bonding (only one is showed); (c) view of two [ZnI<sub>4</sub>]<sup>2-</sup> dianions surrounded by K222–H<sub>2</sub><sup>2+</sup> dications. (d) C–H···I interactions observed in **2**. Color code: Carbon: green; Nitrogen: blue; Oxygen: red; Nitrogen: grey; Hydrogen: light grey. Weak hydrogen bonding shown as dashed lines.

#### 3. Single crystal X-ray structure of **3**.

**Table. S2** Relevant distances in molecular salts **1–4**.

**Fig. S3.** Ball and stick model viewed along the *a*-axis of isostructural crystal structures **2**, **3** and **4** (a), (b) and (c) respectively.

**Fig. S4.** Simulated PXRD pattern of **2** and experimental PXRD pattern of a sample obtained

after grinding K222 and ZnI<sub>2</sub> (1:2 molar ratio) in the presence of a drop of methanol.

**Fig. S5.** Experimental vs simulated from single crystal PXRD patterns of **3** measured at rt. The experimental pattern of the ZnBr<sub>4</sub><sup>2-</sup> was crystallized from methanol. Clearly, both diffraction patterns show the same crystalline structure.

**Fig. S6.** Experimental PXRD of obtained after crystallization of K222 and ZnI<sub>2</sub> (1:2) in ethanol and simulated of **2** crystallized from methanol. Clearly, both diffraction patterns show the same crystalline structure.

**Fig. S7.** Experimental PXRD corresponding to the solid obtained when ZnI<sub>2</sub> was added into a solution of K222 (MeOH) warmed at 45°C. The diffraction pattern corresponds to that of **2**.

**Fig. S8.** Experimental PXRD corresponding to the solid obtained when ZnBr<sub>2</sub> was added into a solution of K222 (MeOH) cooled at 0°C using ice bath. The diffraction pattern corresponds to that of **3**.

**Fig. S9.** Experimental PXRD corresponding to the solid obtained when ZnCl<sub>2</sub> was added into a solution of K222 (MeOH) cooled at 0°C using ice bath. The diffraction pattern corresponds to that of **4**.

**Fig. S10.** Figure showing the  $\mu$ -O-based and  $\mu$ -S clusters based on *ab initio* calculations on the adamantanoid dianion of formula [Zn<sub>4</sub>(MeO)<sub>6</sub>I<sub>4</sub>]<sup>2-</sup> and [Zn<sub>4</sub>(MeS)<sub>6</sub>I<sub>4</sub>]<sup>2-</sup> at the HF-3-21G level. The volumes and distances between opposite  $\mu$ -O(S) atoms 382.5 Å<sup>3</sup> – 4.32 Å and 446.5 Å<sup>3</sup> – 5.44 Å for the  $\mu$ -O and  $\mu$ -S clusters, respectively). An additional carbon on the alkoxide chain would probably lead to significant sterical clash with the apical I atoms.

**Fig. S11.** <sup>1</sup>H-NMR spectrum of a 2.5 mM solution of **1** in DMSO-d<sub>6</sub>:acetone-d<sub>6</sub> 2:1 mixture at 25°C.

**Fig. S12.** Portion of the <sup>1</sup>H-NMR spectrum of a 2.5 mM solution of **1** in DMSO-d<sub>6</sub>:acetone-d<sub>6</sub> 2:1 mixture at 25°C. Two groups of signals (labeled ● and ●) can be identified (at ppm  $\delta$  = 3.60 s, 3.54 t and 2.58 t;  $\delta$  = 3.79 t, 3.78 t and 3.69 s ) and they can be assigned to the cationic K222–H<sub>2</sub><sup>2+</sup> of **1** in both its associated ion-pair and its solvated forms.

**Fig. S13.**  $^1\text{H}$ -NMR spectrum of a 2.5 mM solution of **2** in DMSO- $d_6$ :acetone- $d_6$  2:1 mixture at 25°C and magnification of the 4.0-3.6 ppm region.

**Fig. S14.** Spectral comparison between an equimolar solution of **1** (top) and **2** (bottom) in DMSO- $d_6$ :acetone- $d_6$  2:1 mixture at 25°C. Shift of the K222- $\text{H}_2^{2+}$  signals are highlighted by the black arrows.

## 1. Experimental

### 1.2 X-ray Diffraction Data

Single crystal X-ray diffraction data for **1**, **2** and **3** were recorded with a Bruker X8 Prospector APEX-II/CCD diffractometer equipped with an Incoatec  $I\mu S_{Cu}$  microfocus X-ray source ( $CuK_{\alpha}$  radiation,  $\lambda = 1.54056 \text{ \AA}$ ) and with a CCD detector. The low temperature experiments were collected using a Bruker Oxford Cryosystem device. SHELXL<sup>1</sup> was used for structure solution and refinement. X-ray powder diffraction experiments were recorded on a Bruker D2 Phaser diffractometer ( $\lambda = 1.54056 \text{ \AA}$ ). The  $2\theta$  scan range was  $4.7^{\circ} - 40^{\circ}$  with a step size  $0.02^{\circ}$ . The exposure time was 2s. Simulated PXRD patterns were generated using Mercury Version 3.1 software program. Figures depicting the crystal packing were created using PyMol software.

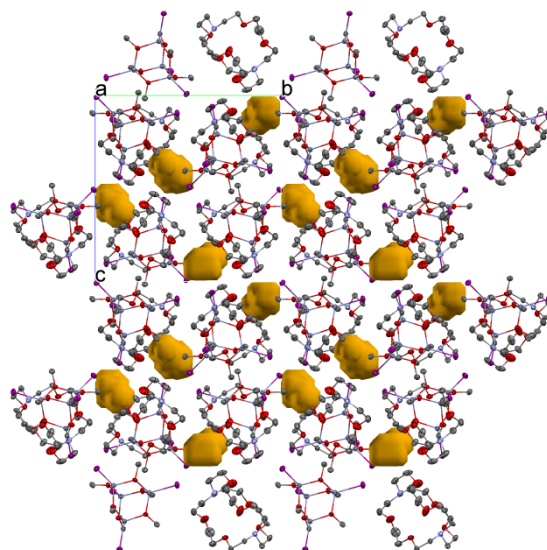

**Fig. S1.** ORTEP view of the crystal structure of **1** after manually removing the water molecule in order to show the void space left (i.e., pocket). Using a 1.2 Å probe radius, grid spacing of 0.5 Å and considering the contact surface area the void volume corresponds to 1.9 % of the total unit cell volume.

**Table. S1** List of all the symmetry operators observed in **1**.

| Number | Symm. Op.      | Description            | Detailed Description                                                                                    | Order | Type |
|--------|----------------|------------------------|---------------------------------------------------------------------------------------------------------|-------|------|
| 1      | x,y,z          | Identity               | Identity                                                                                                | 1     | 1    |
| 2      | z,x,y          | Rotation axis (3-fold) | 3-fold rotation axis with direction [1, 1, 1] at x, x, x                                                | 3     | 3    |
| 3      | y,z,x          | Rotation axis (3-fold) | 3-fold rotation axis with direction [1, 1, 1] at x, x, x                                                | 3     | 3    |
| 4      | 1/2-y,-z,1/2+x | Screw axis (3-fold)    | 3-fold screw axis with direction [1, -1, 1] at x+5/6, -x+1/3, x with screw component [1/3, -1/3, 1/3]   | 3     | 3    |
| 5      | 1/2+z,1/2-x,-y | Rotation axis (3-fold) | 3-fold rotation axis with direction [1, -1, 1] at x+1/2, -x, x                                          | 3     | 3    |
| 6      | y,1/2+z,1/2-x  | Screw axis (3-fold)    | 3-fold screw axis with direction [1, -1, -1] at x+1/6, -x+1/6, -x with screw component [-1/3, 1/3, 1/3] | 3     | 3    |
| 7      | 1/2-z,-x,1/2+y | Rotation axis (3-fold) | 3-fold rotation axis with direction [1, -1, -1] at x+1/2, -x+1/2, -x                                    | 3     | 3    |
| 8      | z,1/2+x,1/2-y  | Rotation axis (3-fold) | 3-fold rotation axis with direction [1, 1, -1] at x, x+1/2, -x                                          | 3     | 3    |
| 9      | 1/2+y,1/2-z,-x | Screw axis (3-fold)    | 3-fold screw axis with direction [1, 1, -1] at x+1/3, x+1/6, -x with screw component [1/3, 1/3, -1/3]   | 3     | 3    |
| 10     | 1/2+x,1/2-y,-z | Screw axis (2-fold)    | 2-fold screw axis with direction [1, 0, 0] at x, 1/4, 0 with screw component [1/2, 0, 0]                | 2     | 2    |
| 11     | x,1/2+y,1/2-z  | Screw axis (2-fold)    | 2-fold screw axis with direction [0, 1, 0] at 0, y, 1/4 with screw component [0, 1/2, 0]                | 2     | 2    |
| 12     | 1/2-x,-y,1/2+z | Screw axis (2-fold)    | 2-fold screw axis with direction [0, 0, 1] at 1/4, 0, z with screw component [0, 0, 1/2]                | 2     | 2    |

## 2. Single crystal X-ray structure of **2**.

In crystal **2**, the K222 is doubly-protonated and adopts the endo-endo type conformation where the N atoms are directed towards the inner cavity of the macrocycle (Figure S1). The O atoms also point inwards the cavity where weak hydrogen bond interaction with the endo N+–H···O group is observed. In **2**, the nonbonding N···N separation (6.340(1) Å) is shorter than that of the empty cryptand (6.871(4) Å). The [ZnI<sub>4</sub>]<sup>2-</sup> anions lying in the 3-fold crystallographic axis have tetrahedral coordination. Two [ZnI<sub>4</sub>]<sup>2-</sup> anions are positioned in a “head-to-head” fashion with intermolecular I···I distance of 3.679(1) Å (Figure S1a and S1c). There is a disordered water molecule that is located between two symmetry related dications. Out of the mother liquors, the crystals of **2** are stable at room temperature in contact with air for several days.

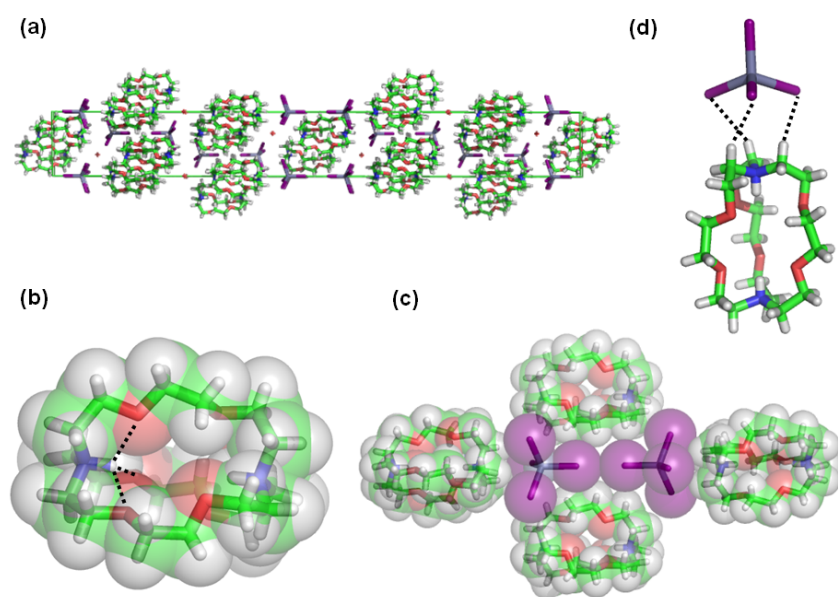

**Fig. S2.** (a) Crystal structure of salt **2** viewed along the *b*-axis; (b) detailed view of the dication showing the trifurcated weak intramolecular N–H···O hydrogen bonding (only one is showed); (c) view of two [ZnI<sub>4</sub>]<sup>2-</sup> dianions surrounded by K222–H<sub>2</sub><sup>2+</sup> dications. (d) C–H···I interactions observed in **2**. Color code: Carbon: green; Nitrogen: blue; Oxygen: red; Nitrogen: grey; Hydrogen: light grey. Weak hydrogen bonding shown as dashed lines.

## 3. Single crystal X-ray structure of **3**.

Using the same protocol, we set up crystallization experiments using ZnBr<sub>2</sub> and ZnCl<sub>2</sub> instead of ZnI<sub>2</sub>. Colorless plate-like crystals precipitated after 1 hour, however the solution was left over a week to allow crystallization to proceed. Single crystal X-ray diffraction showed that an isostructural [ZnBr<sub>4</sub>]<sup>2-</sup> complex (**3**) to the reported ZnCl<sub>2</sub> version (**4**),<sup>2</sup> had been obtained (R-3c)

and therefore, the molecular packing has been maintained in this class of hybrid metal-organic salts.

**Table. S2** Relevant distances in molecular salts **1–4**.

| Crystal  | C–H...X <sup>a</sup><br>(Å) | Zn...Zn<br>(Å) | N...N (Å) |
|----------|-----------------------------|----------------|-----------|
| <b>1</b> | 4.009(9)                    | -              | 6.124(9)  |
| <b>2</b> | 3.95(1)                     | 8.823(2)       | 6.34(1)   |
| <b>3</b> | 3.705(5)                    | 8.317(1)       | 6.380(2)  |
| <b>4</b> | 3.770(2)                    | 8.0269(8)      | 6.376(2)  |

<sup>a</sup> C...X = I, Br, Cl.

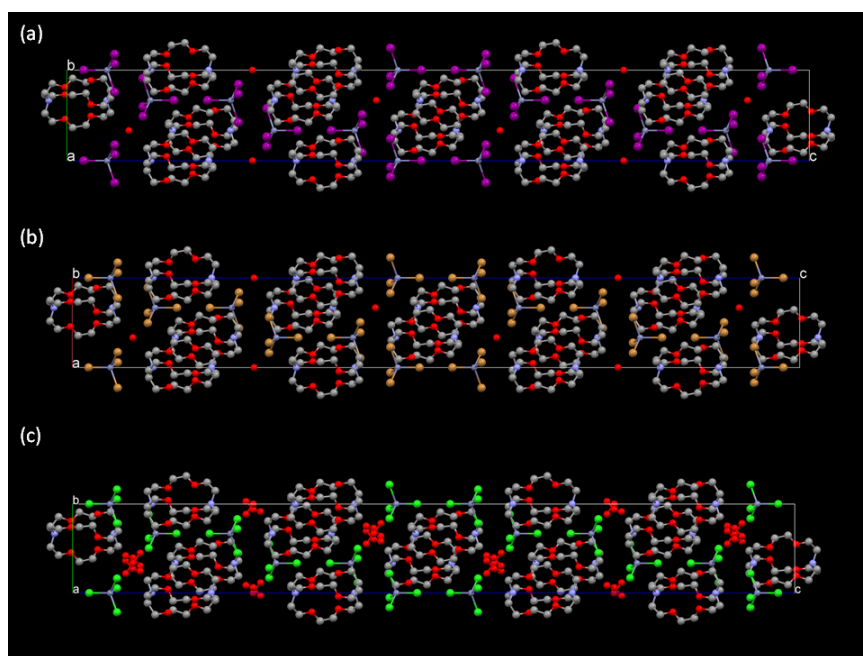

**Fig. S3.** Ball and stick model viewed along the *a*-axis of isostructural crystal structures **2**, **3** and **4** (a), (b) and (c) respectively.

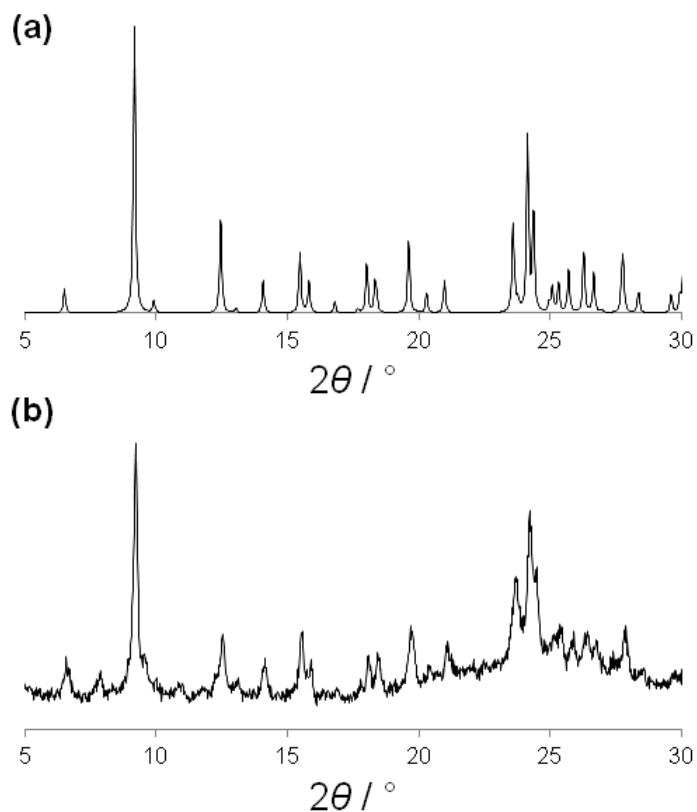

**Fig. S4.** Simulated PXRD pattern of **2** and experimental PXRD pattern of a sample obtained after grinding K222 and  $\text{ZnI}_2$  (1:2 molar ratio) in the presence of a drop of methanol.

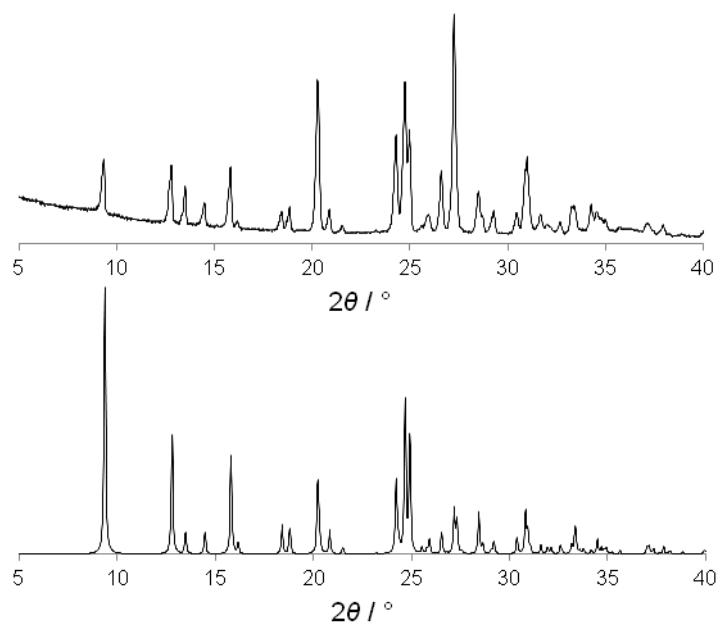

**Fig. S5.** Experimental vs simulated from single crystal PXRD patterns of **3** measured at rt. The experimental pattern of the  $\text{ZnBr}_4^{2-}$  was crystallized from methanol. Clearly, both diffraction patterns show the same crystalline structure.



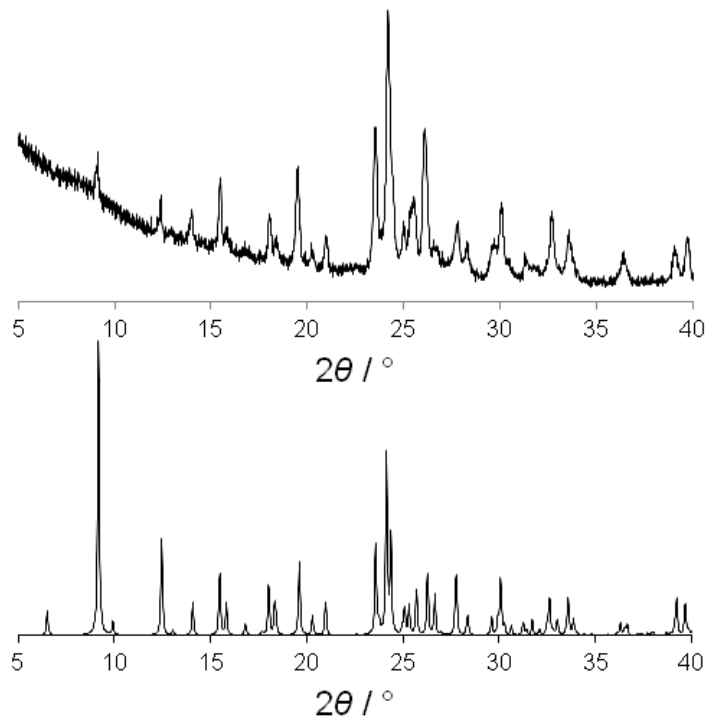

**Fig. S6.** Experimental PXRD of obtained after crystallization of K222 and  $\text{ZnI}_2$  (1:2) in ethanol and simulated of **2** crystallized from methanol. Clearly, both diffraction patterns show the same crystalline structure.

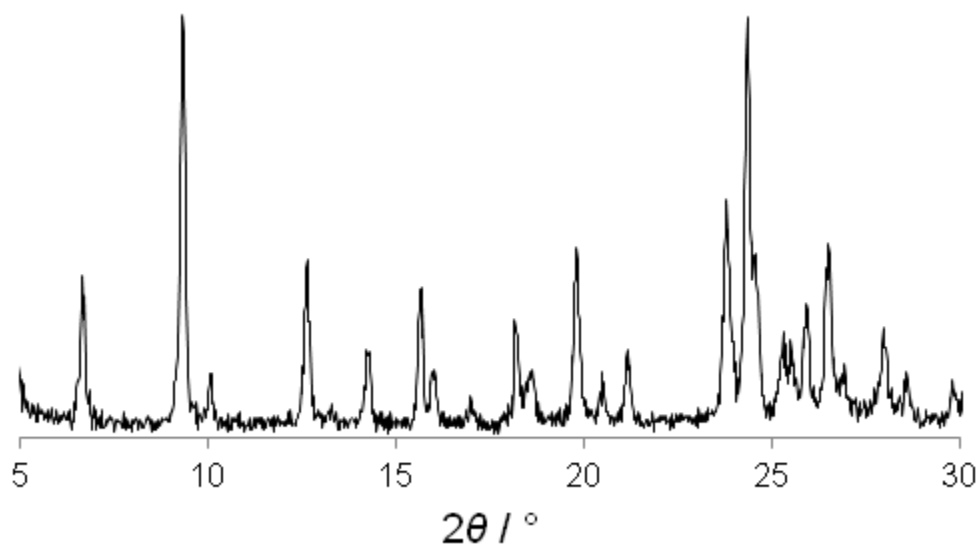

**Fig. S7.** Experimental PXRD corresponding to the solid obtained when  $\text{ZnI}_2$  was added into a solution of K222 (MeOH) warmed at  $45^\circ\text{C}$ . The diffraction pattern corresponds to that of **2**.

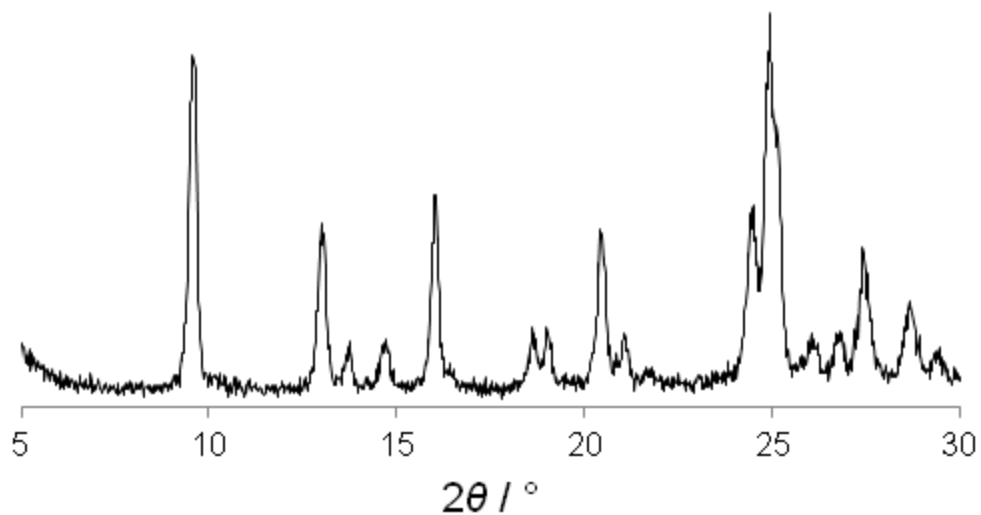

**Fig. S8.** Experimental PXRD corresponding to the solid obtained when  $\text{ZnBr}_2$  was added into a solution of K222 (MeOH) cooled at  $0^\circ\text{C}$  using ice bath. The diffraction pattern corresponds to that of **3**.

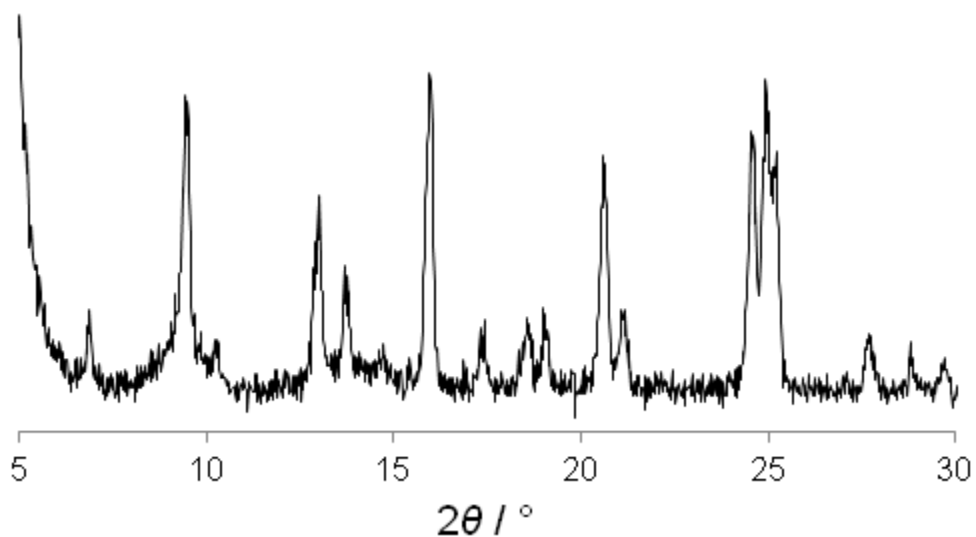

**Fig. S9.** Experimental PXRD corresponding to the solid obtained when  $\text{ZnCl}_2$  was added into a solution of K222 (MeOH) cooled at  $0^\circ\text{C}$  using ice bath. The diffraction pattern corresponds to that of **4**.

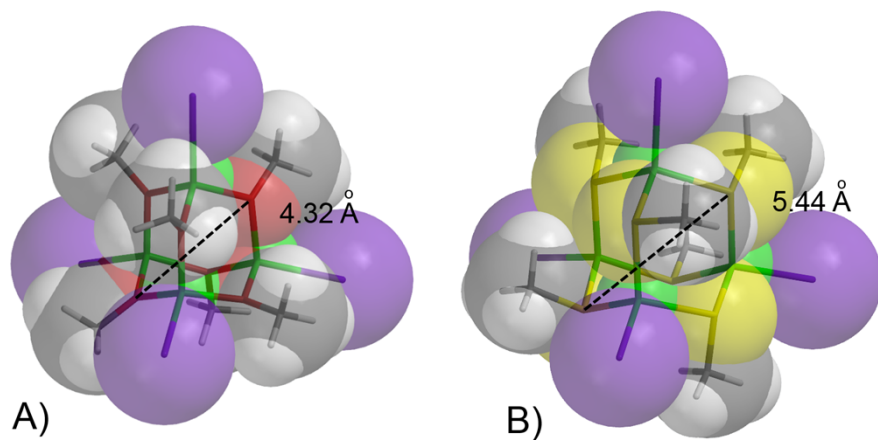

**Fig. S10.** Figure showing the  $\mu$ -O-based and  $\mu$ -S clusters based on *ab initio* calculations on the adamantanoid dianion of formula  $[\text{Zn}_4(\text{MeO})_6\text{I}_4]^{2-}$  and  $[\text{Zn}_4(\text{MeS})_6\text{I}_4]^{2-}$  at the HF-3-21G level. The volumes and distances between opposite  $\mu$ -O(S) atoms 382.5 Å<sup>3</sup> – 4.32 Å and 446.5 Å<sup>3</sup> – 5.44 Å for the  $\mu$ -O and  $\mu$ -S clusters, respectively). An additional carbon on the alkoxide chain would probably lead to significant sterical clash with the apical I atoms.

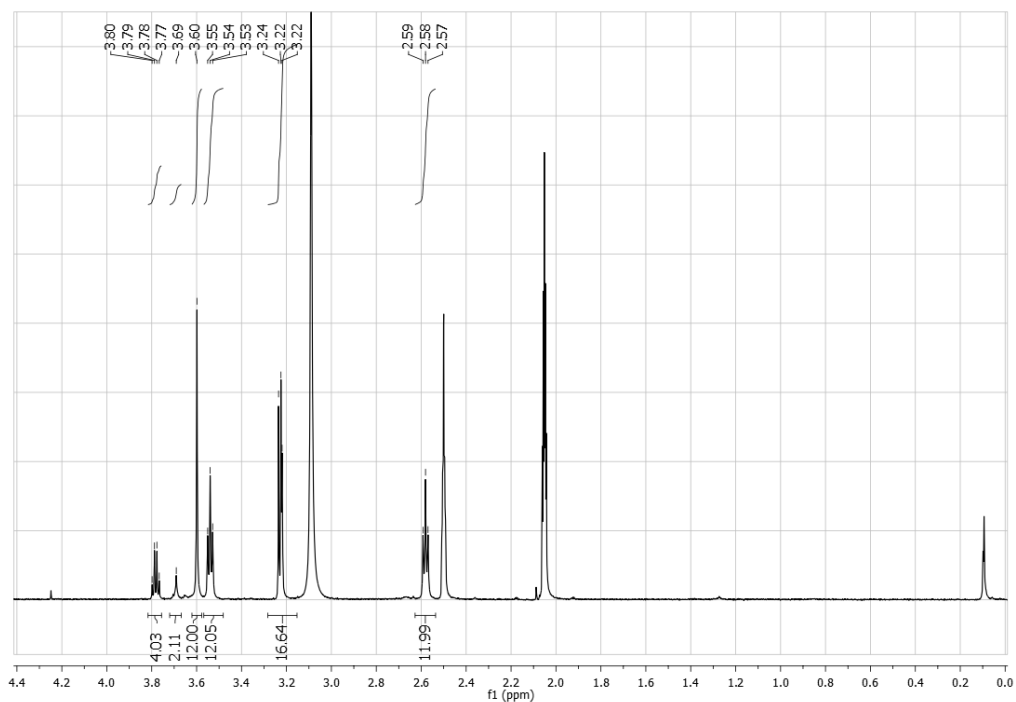

**Fig. S11.**  $^1\text{H-NMR}$  spectrum of a 2.5 mM solution of **1** in DMSO- $d_6$ :acetone- $d_6$  2:1 mixture at 25°C.

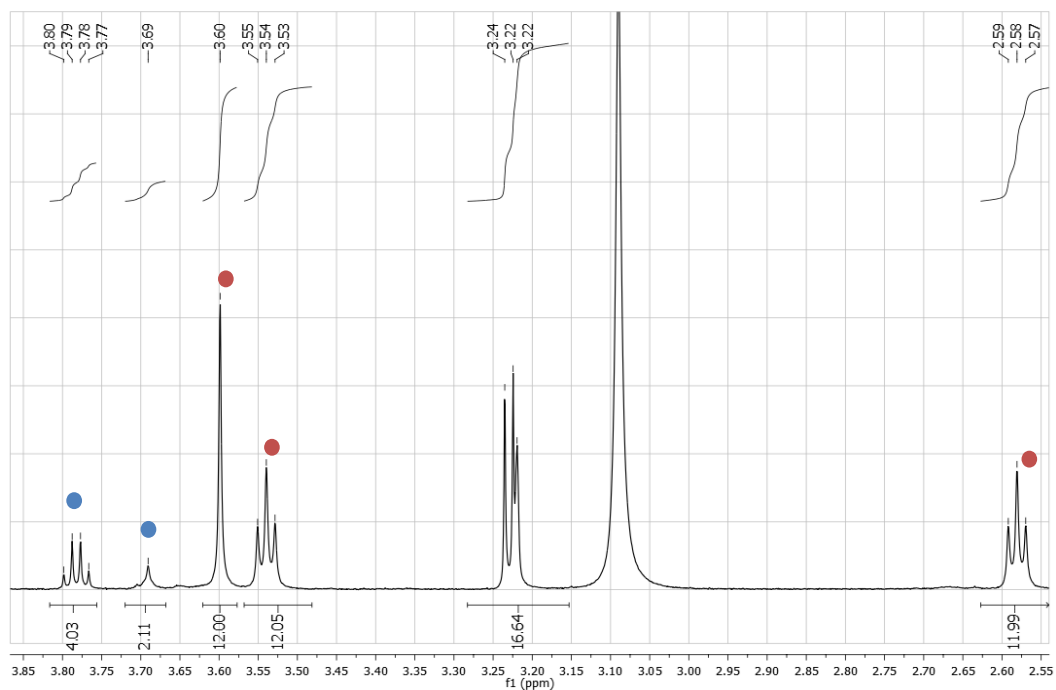

**Fig. S12.** Portion of the  $^1\text{H-NMR}$  spectrum of a 2.5 mM solution of **1** in DMSO- $d_6$ :acetone- $d_6$  2:1 mixture at 25°C. Two groups of signals (labeled  $\bullet$  and  $\bullet$ ) can be identified (at ppm  $\delta = 3.60$  s, 3.54 t and 2.58 t;  $\delta = 3.79$  t, 3.78 t and 3.69 s) and they can be assigned to the cationic K222- $\text{H}_2^{2+}$  of **1** in both its associated ion-pair and its solvated forms.

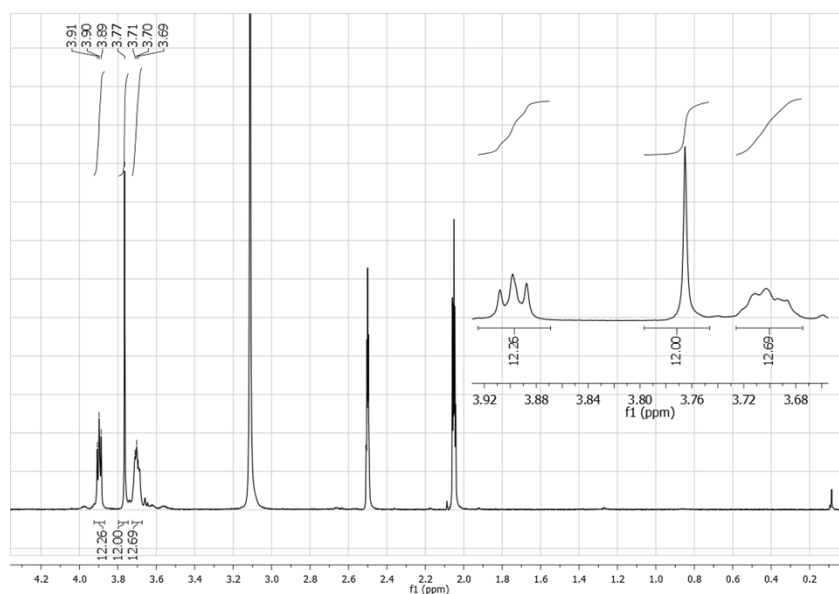

**Fig. S13.** <sup>1</sup>H-NMR spectrum of a 2.5 mM solution of **2** in DMSO-d<sub>6</sub>:acetone-d<sub>6</sub> 2:1 mixture at 25°C and magnification of the 4.0-3.6 ppm region.

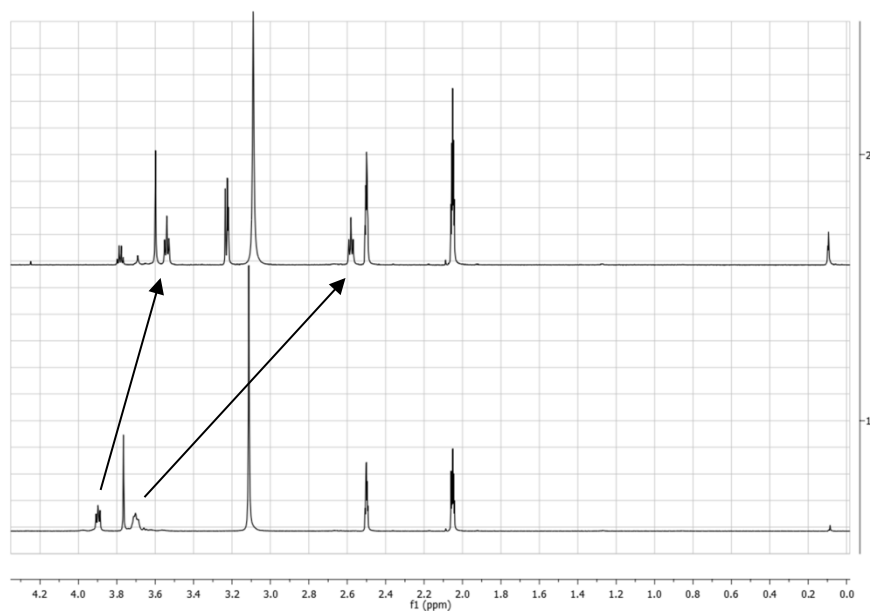

**Fig. S14.** Spectral comparison between an equimolar solution of **1** (top) and **2** (bottom) in DMSO-d<sub>6</sub>:acetone-d<sub>6</sub> 2:1 mixture at 25°C. Shift of the K222-H<sub>2</sub><sup>2+</sup> signals are highlighted by the black arrows.

# checkCIF/PLATON (standard)

---

You have not supplied any structure factors. As a result the full set of tests cannot be run.

No syntax errors found.  
Please wait while processing ....

[CIF dictionary](#)  
[Interpreting this report](#)

## Datablock: 1

---

|                        |                                              |                       |
|------------------------|----------------------------------------------|-----------------------|
| Bond precision:        | C-C = 0.0127 A                               | Wavelength=1.54178    |
| Cell:                  | a=16.3228 (18) b=16.3228 (18) c=16.3228 (18) |                       |
|                        | alpha=90 beta=90 gamma=90                    |                       |
| Temperature:           | 100 K                                        |                       |
|                        | Calculated                                   | Reported              |
| Volume                 | 4349.0 (14)                                  | 4348.9 (8)            |
| Space group            | P 21 3                                       | P213                  |
| Hall group             | P 2ac 2ab 3                                  | ?                     |
| Moiety formula         | C18 H38 N2 O6, C6 H18 I4 O6<br>Zn4, 0.3(O)   | ?                     |
| Sum formula            | C24 H56 I4 N2 O12.30 Zn4                     | C24 H58 I4 N2 O12 Zn4 |
| Mr                     | 1338.67                                      | 1335.80               |
| Dx, g cm <sup>-3</sup> | 2.045                                        | 2.040                 |
| Z                      | 4                                            | 4                     |
| Mu (mm <sup>-1</sup> ) | 25.223                                       | 25.215                |
| F000                   | 2577.6                                       | 2576.0                |
| F000'                  | 2554.58                                      |                       |
| h, k, lmax             | 19, 19, 19                                   | 14, 18, 18            |
| Nref                   | 2502 [ 1393]                                 | 2127                  |
| Tmin, Tmax             | 0.180, 0.220                                 | 0.141, 0.299          |

Tmin' 0.025

Correction method= MULTI-SCAN

Data completeness= 1.53/0.85 Theta(max)= 65.460

R(reflections)= 0.0316( 1972) wR2(reflections)= 0.0718( 2127)

S = 1.072 Npar= 148

---

The following ALERTS were generated. Each ALERT has the format

**test-name\_ALERT\_alert-type\_alert-level.**

Click on the hyperlinks for more details of the test.

---

### ● Alert level B

[PLAT222\\_ALERT\\_3\\_B](#) Large Non-Solvent H Uiso(max)/Uiso(min) ..  
8.0 Ratio

---

### ● Alert level C

[ABSTY02\\_ALERT\\_1\\_C](#) An \_exptl\_absorpt\_correction\_type has been given  
without

a literature citation. This should be contained in the  
\_exptl\_absorpt\_process\_details field.

Absorption correction given as Multi-scan

[PLAT029\\_ALERT\\_3\\_C](#) \_diffn\_measured\_fraction\_theta\_full Low .....  
0.969

[PLAT041\\_ALERT\\_1\\_C](#) Calc. and Reported SumFormula Strings Differ  
Please Check

[PLAT068\\_ALERT\\_1\\_C](#) Reported F000 Differs from Calcd (or Missing)...  
Please Check

[PLAT090\\_ALERT\\_3\\_C](#) Poor Data / Parameter Ratio (Zmax > 18) .....  
9.41

[PLAT230\\_ALERT\\_2\\_C](#) Hirshfeld Test Diff for C3 -- C4 .. 5.3  
su

[PLAT245\\_ALERT\\_2\\_C](#) U(iso) H101 Smaller than U(eq) N1 by ...  
0.023 AngSq

[PLAT342\\_ALERT\\_3\\_C](#) Low Bond Precision on C-C Bonds .....  
0.0127 Ang.

---

### ● Alert level G

[FORMU01\\_ALERT\\_2\\_G](#) There is a discrepancy between the atom counts in  
the

\_chemical\_formula\_sum and the formula from the \_atom\_site\*  
data.

Atom count from \_chemical\_formula\_sum: C24 H58 I4 N2 O12

Zn4

Atom count from the \_atom\_site data: C24 H56 I4 N2 O12.3 Zn4

[CELLZ01\\_ALERT\\_1\\_G](#) Difference between formula and atom\_site contents  
detected.

[CELLZ01\\_ALERT\\_1\\_G](#) ALERT: Large difference may be due to a  
symmetry error - see SYMMG tests

From the CIF: \_cell\_formula\_units\_Z 4

From the CIF: \_chemical\_formula\_sum C24 H58 I4 N2 O12 Zn4

TEST: Compare cell contents of formula and atom\_site data

| atom | Z*formula | cif sites | diff |
|------|-----------|-----------|------|
| C    | 96.00     | 96.00     | 0.00 |
| H    | 232.00    | 224.00    | 8.00 |
| I    | 16.00     | 16.00     | 0.00 |
| N    | 8.00      | 8.00      | 0.00 |

O 48.00 49.20 -1.20  
Zn 16.00 16.00 0.00

[PLAT002\\_ALERT\\_2\\_G](#) Number of Distance or Angle Restraints on AtSite  
4 Note

[PLAT005\\_ALERT\\_5\\_G](#) No `_iucr_refine_instructions_details` in the CIF  
Please Do !

[PLAT152\\_ALERT\\_1\\_G](#) The Supplied and Calc. Volume s.u. Differ by ...  
6 Units

[PLAT302\\_ALERT\\_4\\_G](#) Anion/Solvent Disorder ..... Percentage =  
100 Note

[PLAT311\\_ALERT\\_2\\_G](#) Isolated Disordered Oxygen Atom (No H's ?) .....  
O1S Check

[PLAT860\\_ALERT\\_3\\_G](#) Number of Least-Squares Restraints .....  
2 Note

[PLAT950\\_ALERT\\_5\\_G](#) Reported and Calculated Hmax Values Differ by ..  
5

---

0 **ALERT level A** = Most likely a serious problem - resolve or explain  
1 **ALERT level B** = A potentially serious problem, consider carefully  
8 **ALERT level C** = Check. Ensure it is not caused by an omission or oversight  
10 **ALERT level G** = General information/check it is not something unexpected

6 ALERT type 1 CIF construction/syntax error, inconsistent or missing data

5 ALERT type 2 Indicator that the structure model may be wrong or deficient

5 ALERT type 3 Indicator that the structure quality may be low

1 ALERT type 4 Improvement, methodology, query or suggestion

2 ALERT type 5 Informative message, check

---

#### Validation response form

Please find below a validation response form (VRF) that can be filled in and pasted into your CIF.

```
# start Validation Reply Form
_vrf_PLAT222_test
;
PROBLEM: Large Non-Solvent H Uiso(max)/Uiso(min) .. 8.0 Ratio
RESPONSE: ...
;
# end Validation Reply Form
```

---

It is advisable to attempt to resolve as many as possible of the alerts in all categories. Often the minor alerts point to easily fixed oversights, errors and omissions in your CIF or refinement strategy, so attention to these fine details can be worthwhile. In order to resolve some of the more serious problems it may be necessary to carry out additional measurements or structure refinements. However, the purpose of your study may justify the reported deviations and the more serious of these should normally be commented upon in the discussion or experimental section of a paper or in the "special\_details" fields of the CIF. checkCIF was carefully designed to identify outliers and unusual parameters, but every test has its limitations and alerts that are not important in a particular case may appear. Conversely, the absence of alerts does not guarantee there are no aspects of the results needing attention. It is up to the individual to critically assess their own results and, if necessary, seek expert advice.

#### Publication of your CIF in IUCr journals

A basic structural check has been run on your CIF. These basic checks will be run on all CIFs submitted for publication in IUCr journals (*Acta Crystallographica*, *Journal of Applied*



*Crystallography, Journal of Synchrotron Radiation*); however, if you intend to submit to *Acta Crystallographica Section C* or *E*, you should make sure that [full publication checks](#) are run on the final version of your CIF prior to submission.

#### Publication of your CIF in other journals

Please refer to the *Notes for Authors* of the relevant journal for any special instructions relating to CIF submission.

---

PLATON version of 18/09/2013; check.def file version of 12/09/2013

## Datablock 1 - ellipsoid plot

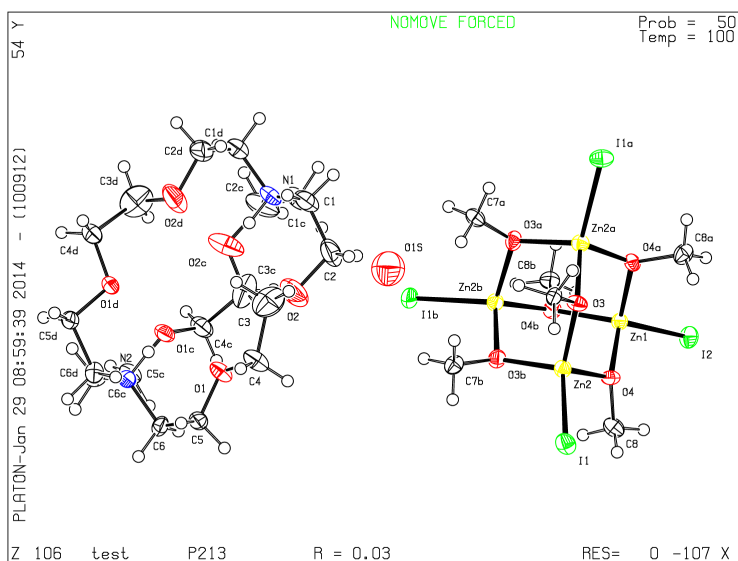

# checkCIF/PLATON (standard)

---

You have not supplied any structure factors. As a result the full set of tests cannot be run.

No syntax errors found.  
Please wait while processing ....

[CIF dictionary](#)  
[Interpreting this report](#)

## Datablock: 2

---

Bond precision: C-C = 0.0157 Å Wavelength=1.54178

Cell: a=11.4410 (7) b=11.4410 (7) c=81.313 (6)  
alpha=90 beta=90 gamma=120

Temperature: 296 K

|                        | Calculated                    | Reported               |
|------------------------|-------------------------------|------------------------|
| Volume                 | 9217.6 (15)                   | 9217.6 (11)            |
| Space group            | R -3 c                        | R-3c                   |
| Hall group             | -R 3 2" c                     | ?                      |
| Moiety formula         | C18 H38 N2 O6, I4 Zn, 0.15(O) | ?                      |
| Sum formula            | C18 H38 I4 N2 O6.15 Zn        | C18 H40 I4 N2 O6.17 Zn |
| Mr                     | 953.89                        | 956.16                 |
| Dx, g cm <sup>-3</sup> | 2.062                         | 2.067                  |
| Z                      | 12                            | 12                     |
| Mu (mm <sup>-1</sup> ) | 32.930                        | 32.931                 |
| F000                   | 5414.4                        | 5440.0                 |
| F000'                  | 5398.73                       |                        |
| h, k, lmax             | 13, 13, 96                    | 13, 13, 95             |
| Nref                   | 1804                          | 1797                   |
| Tmin, Tmax             | 0.035, 0.518                  | 0.100, 0.518           |

Tmin' 0.006  
Correction method= MULTI-SCAN  
Data completeness= 0.996 Theta(max)= 65.980  
R(reflections)= 0.0617( 1620) wR2(reflections)= 0.1760( 1797)  
S = 1.127 Npar= 100

---

The following ALERTS were generated. Each ALERT has the format  
**test-name\_ALERT\_alert-type\_alert-level**.  
Click on the hyperlinks for more details of the test.

---

### ● Alert level C

[ABSTY02\\_ALERT\\_1\\_C](#) An \_exptl\_absorpt\_correction\_type has been given without  
a literature citation. This should be contained in the  
\_exptl\_absorpt\_process\_details field.  
Absorption correction given as Multi-scan  
[PLAT041\\_ALERT\\_1\\_C](#) Calc. and Reported SumFormula Strings Differ  
Please Check  
[PLAT068\\_ALERT\\_1\\_C](#) Reported F000 Differs from Calcd (or Missing)...  
Please Check  
[PLAT094\\_ALERT\\_2\\_C](#) Ratio of Maximum / Minimum Residual Density ....  
2.40  
[PLAT222\\_ALERT\\_3\\_C](#) Large Non-Solvent H Uiso(max)/Uiso(min) ..  
6.5 Ratio  
[PLAT342\\_ALERT\\_3\\_C](#) Low Bond Precision on C-C Bonds .....  
0.0157 Ang.

---

### ● Alert level G

[FORMU01\\_ALERT\\_2\\_G](#) There is a discrepancy between the atom counts in  
the  
\_chemical\_formula\_sum and the formula from the \_atom\_site\*  
data.  
Atom count from \_chemical\_formula\_sum: C18 H40 I4 N2 O6.17  
Zn1  
Atom count from the \_atom\_site data: C18 H38 I4 N2 O6.15 Zn1  
[CELLZ01\\_ALERT\\_1\\_G](#) Difference between formula and atom\_site contents  
detected.  
[CELLZ01\\_ALERT\\_1\\_G](#) WARNING: H atoms missing from atom site list. Is  
this intentional?  
From the CIF: \_cell\_formula\_units\_Z 12  
From the CIF: \_chemical\_formula\_sum C18 H40 I4 N2 O6.17 Zn  
TEST: Compare cell contents of formula and atom\_site data

| atom | Z*formula | cif sites | diff  |
|------|-----------|-----------|-------|
| C    | 216.00    | 216.00    | 0.00  |
| H    | 480.00    | 456.00    | 24.00 |
| I    | 48.00     | 48.00     | 0.00  |
| N    | 24.00     | 24.00     | 0.00  |
| O    | 74.04     | 73.80     | 0.24  |
| Zn   | 12.00     | 12.00     | 0.00  |

[PLAT002\\_ALERT\\_2\\_G](#) Number of Distance or Angle Restraints on AtSite  
4 Note  
[PLAT005\\_ALERT\\_5\\_G](#) No \_iucr\_refine\_instructions\_details in the CIF  
Please Do !  
[PLAT072\\_ALERT\\_2\\_G](#) SHELXL First Parameter in WGHT Unusually Large.  
0.10

[PLAT083 ALERT 2 G](#) SHELXL Second Parameter in WGHT Unusually Large. 170.68  
[PLAT152 ALERT 1 G](#) The Supplied and Calc. Volume s.u. Differ by ...  
4 Units  
[PLAT302 ALERT 4 G](#) Anion/Solvent Disorder ..... Percentage =  
6 Note  
[PLAT311 ALERT 2 G](#) Isolated Disordered Oxygen Atom (No H's ?) .....  
O7 Check  
[PLAT764 ALERT 4 G](#) Overcomplete CIF Bond List Detected (Rep/Expd) .  
1.13 Ratio  
[PLAT794 ALERT 5 G](#) Tentative Bond Valency for Zn1 (II) .....  
2.02 Note  
[PLAT860 ALERT 3 G](#) Number of Least-Squares Restraints .....  
2 Note

---

0 **ALERT level A** = Most likely a serious problem - resolve or explain  
0 **ALERT level B** = A potentially serious problem, consider carefully  
6 **ALERT level C** = Check. Ensure it is not caused by an omission or oversight  
13 **ALERT level G** = General information/check it is not something unexpected

6 ALERT type 1 CIF construction/syntax error, inconsistent or missing data  
6 ALERT type 2 Indicator that the structure model may be wrong or deficient  
3 ALERT type 3 Indicator that the structure quality may be low  
2 ALERT type 4 Improvement, methodology, query or suggestion  
2 ALERT type 5 Informative message, check

---

It is advisable to attempt to resolve as many as possible of the alerts in all categories. Often the minor alerts point to easily fixed oversights, errors and omissions in your CIF or refinement strategy, so attention to these fine details can be worthwhile. In order to resolve some of the more serious problems it may be necessary to carry out additional measurements or structure refinements. However, the purpose of your study may justify the reported deviations and the more serious of these should normally be commented upon in the discussion or experimental section of a paper or in the "special\_details" fields of the CIF. checkCIF was carefully designed to identify outliers and unusual parameters, but every test has its limitations and alerts that are not important in a particular case may appear. Conversely, the absence of alerts does not guarantee there are no aspects of the results needing attention. It is up to the individual to critically assess their own results and, if necessary, seek expert advice.

#### **Publication of your CIF in IUCr journals**

A basic structural check has been run on your CIF. These basic checks will be run on all CIFs submitted for publication in IUCr journals (*Acta Crystallographica*, *Journal of Applied Crystallography*, *Journal of Synchrotron Radiation*); however, if you intend to submit to *Acta Crystallographica Section C* or *E*, you should make sure that [full publication checks](#) are run on the final version of your CIF prior to submission.

#### **Publication of your CIF in other journals**

Please refer to the *Notes for Authors* of the relevant journal for any special instructions relating to CIF submission.

## Datablock 2 - ellipsoid plot

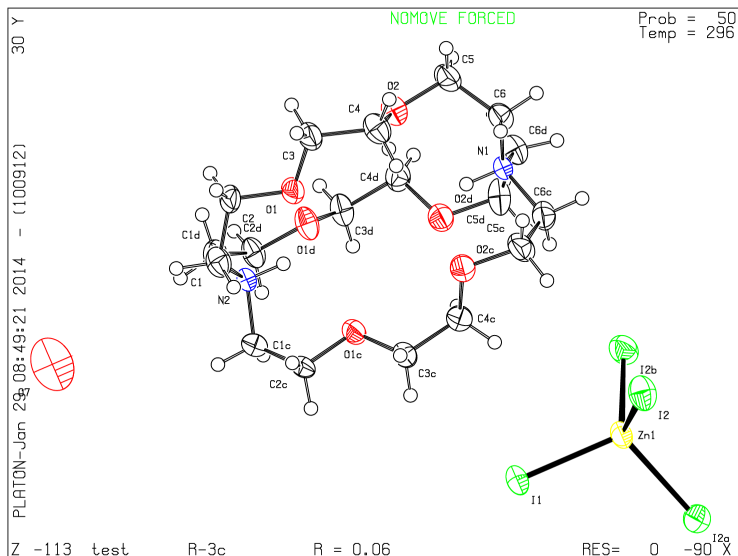

[Download CIF editor \(pubCIF\) from the IUCr](#)  
[Download CIF editor \(enCIFer\) from the CCDC](#)  
[Test a new CIF entry](#)

## checkCIF/PLATON (standard)

You have not supplied any structure factors. As a result the full set of tests cannot be run.

No syntax errors found.  
Please wait while processing ....

[CIF dictionary](#)  
[Interpreting this report](#)

## Datablock: 3

Bond precision: C-C = 0.0067 Å Wavelength=1.54178

Cell: a=11.0600 (6) b=11.0600 (6) c=78.221 (5)

alpha=90 beta=90 gamma=120

Temperature: 100 K

|                               | Calculated                       | Reported                         |
|-------------------------------|----------------------------------|----------------------------------|
| Volume                        | 8286.4 (12)                      | 8286.4 (8)                       |
| Space group                   | R -3 c                           | R-3c                             |
| Hall group                    | -R 3 2" c                        | ?                                |
| Moiety formula                | 2(C18 H38 N2 O6), 2(Br4 Zn), O ? |                                  |
| Sum formula                   | C36 H76 Br8 N4 O13 Zn2           | C18 H40 Br4 N2 O7 Zn             |
| Mr                            | 1542.99                          | 781.53                           |
| Dx, g cm-3                    | 1.855                            | 1.879                            |
| Z                             | 6                                | 12                               |
| Mu (mm-1)                     | 8.320                            | 8.343                            |
| F000                          | 4584.0                           | 4656.0                           |
| F000'                         | 4541.18                          |                                  |
| h, k, lmax                    | 13, 13, 92                       | 13, 13, 92                       |
| Nref                          | 1632                             | 1622                             |
| Tmin, Tmax                    | 0.576, 0.716                     | 0.388, 0.731                     |
| Tmin'                         | 0.296                            |                                  |
| Correction method= MULTI-SCAN |                                  |                                  |
| Data completeness=            | 0.994                            | Theta (max)= 66.390              |
| R(reflections)=               | 0.0344 ( 1439)                   | wR2(reflections)= 0.1019 ( 1622) |
| S =                           | 1.093                            | Npar= 100                        |

The following ALERTS were generated. Each ALERT has the format  
**test-name\_ALERT\_alert-type\_alert-level**.  
Click on the hyperlinks for more details of the test.

### ● Alert level B

[PLAT306\\_ALERT\\_2\\_B](#) Isolated Oxygen Atom (H-atoms Missing ?) .....  
O1S Check

### ● Alert level C

[ABSTY02\\_ALERT\\_1\\_C](#) An \_exptl\_absorpt\_correction\_type has been given  
without

a literature citation. This should be contained in the  
\_exptl\_absorpt\_process\_details field.

Absorption correction given as Multi-scan

[CHEMW03\\_ALERT\\_2\\_C](#) The ratio of given/expected molecular weight as

calculated from the \_atom\_site\* data lies outside the range 0.99 <> 1.01

From the CIF: \_cell\_formula\_units\_Z 12  
From the CIF: \_chemical\_formula\_weight 781.53  
TEST: Calculate formula weight from \_atom\_site\_\*

| atom | mass  | num   | sum    |
|------|-------|-------|--------|
| C    | 12.01 | 18.00 | 216.20 |
| H    | 1.01  | 38.00 | 38.30  |
| N    | 14.01 | 2.00  | 28.01  |
| O    | 16.00 | 6.50  | 103.99 |
| Zn   | 65.39 | 1.00  | 65.39  |
| Br   | 79.90 | 4.00  | 319.62 |

Calculated formula weight 771.52

[PLAT041 ALERT 1 C](#) Calc. and Reported SumFormula Strings Differ  
Please Check

[PLAT043 ALERT 1 C](#) Calculated and Reported Mol. Weight Differ by ..  
20.07 Check

[PLAT068 ALERT 1 C](#) Reported F000 Differs from Calcd (or Missing)...  
Please Check

[PLAT094 ALERT 2 C](#) Ratio of Maximum / Minimum Residual Density ....  
2.08

[PLAT341 ALERT 3 C](#) Low Bond Precision on C-C Bonds .....  
0.0067 Ang.

---

## Alert level G

[FORMU01 ALERT 2 G](#) There is a discrepancy between the atom counts in the

\_chemical\_formula\_sum and the formula from the \_atom\_site\* data.

Atom count from \_chemical\_formula\_sum: C18 H40 Br4 N2 O7

Zn1

Atom count from the \_atom\_site data: C18 H38 Br4 N2 O6.5 Zn1

[CELLZ01 ALERT 1 G](#) Difference between formula and atom\_site contents detected.

[CELLZ01 ALERT 1 G](#) ALERT: Large difference may be due to a symmetry error - see SYMMG tests

From the CIF: \_cell\_formula\_units\_Z 12

From the CIF: \_chemical\_formula\_sum C18 H40 Br4 N2 O7 Zn

TEST: Compare cell contents of formula and atom\_site data

| atom | Z*formula | cif sites | diff  |
|------|-----------|-----------|-------|
| C    | 216.00    | 216.00    | 0.00  |
| H    | 480.00    | 456.00    | 24.00 |
| Br   | 48.00     | 48.00     | 0.00  |
| N    | 24.00     | 24.00     | 0.00  |
| O    | 84.00     | 78.00     | 6.00  |
| Zn   | 12.00     | 12.00     | 0.00  |

[PLAT002 ALERT 2 G](#) Number of Distance or Angle Restraints on AtSite  
4 Note

[PLAT005 ALERT 5 G](#) No \_iucr\_refine\_instructions\_details in the CIF  
Please Do !

[PLAT045 ALERT 1 G](#) Calculated and Reported Z Differ by .....  
0.50 Ratio

[PLAT083 ALERT 2 G](#) SHELXL Second Parameter in WGHT Unusually  
Large. 35.49

[PLAT152 ALERT 1 G](#) The Supplied and Calc. Volume s.u. Differ by ...  
4 Units

[PLAT434 ALERT 2 G](#) Short Inter HL..HL Contact Br1 .. Br1 .  
3.55 Ang.

[PLAT764 ALERT 4 G](#) Overcomplete CIF Bond List Detected (Rep/Expd) .  
1.13 Ratio

[PLAT794 ALERT 5 G](#) Tentative Bond Valency for Zn3 (II) .....  
1.94 Note

[PLAT860 ALERT 3 G](#) Number of Least-Squares Restraints .....  
2 Note

---

0 **ALERT level A** = Most likely a serious problem - resolve or explain  
1 **ALERT level B** = A potentially serious problem, consider carefully  
7 **ALERT level C** = Check. Ensure it is not caused by an omission or oversight  
12 **ALERT level G** = General information/check it is not something unexpected

8 ALERT type 1 CIF construction/syntax error, inconsistent or missing data

7 ALERT type 2 Indicator that the structure model may be wrong or deficient

2 ALERT type 3 Indicator that the structure quality may be low

1 ALERT type 4 Improvement, methodology, query or suggestion

2 ALERT type 5 Informative message, check

---

#### Validation response form

Please find below a validation response form (VRF) that can be filled in and pasted into your CIF.

```
# start Validation Reply Form
_vrf_PLAT306_test_trigonal
;
PROBLEM: Isolated Oxygen Atom (H-atoms Missing ?) ..... O1S
Check
RESPONSE: ...
;
# end Validation Reply Form
```

---

It is advisable to attempt to resolve as many as possible of the alerts in all categories. Often the minor alerts point to easily fixed oversights, errors and omissions in your CIF or refinement strategy, so attention to these fine details can be worthwhile. In order to resolve some of the more serious problems it may be necessary to carry out additional measurements or structure refinements. However, the purpose of your study may justify the reported deviations and the more serious of these should normally be commented upon in the discussion or experimental section of a paper or in the "special\_details" fields of the CIF. checkCIF was carefully designed to identify outliers and unusual parameters, but every test has its limitations and alerts that are not important in a particular case may appear. Conversely, the absence of alerts does not guarantee there are no aspects of the results needing attention. It is up to the individual to critically assess their own results and, if necessary, seek expert advice.

#### Publication of your CIF in IUCr journals

A basic structural check has been run on your CIF. These basic checks will be run on all CIFs submitted for publication in IUCr journals (*Acta Crystallographica*, *Journal of Applied Crystallography*, *Journal of Synchrotron Radiation*); however, if you intend to submit to *Acta Crystallographica Section C* or *E*, you should make sure that [full publication checks](#) are run on the final version of your CIF prior to submission.

#### Publication of your CIF in other journals

Please refer to the *Notes for Authors* of the relevant journal for any special instructions relating to CIF submission.

---



# Datablock 3 - ellipsoid plot

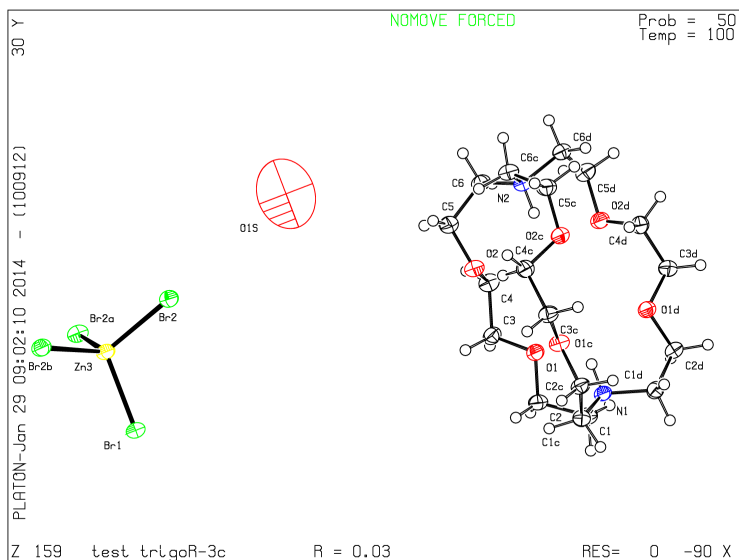

- 1 G. M. Sheldrick, *Acta Crystallogr., Sect. A: Fundam. Crystallogr.*, 2008, **64**, 112.
- 2 A. N. Chekhlov, *Russ. J. Coord. Chem.* 2007, **33**, 932.
